# Supplementary material
Source: MDPI journal article supplement (https://www.mdpi.com/2306-5710/8/4/62)
Supplement: s1 [file s1]

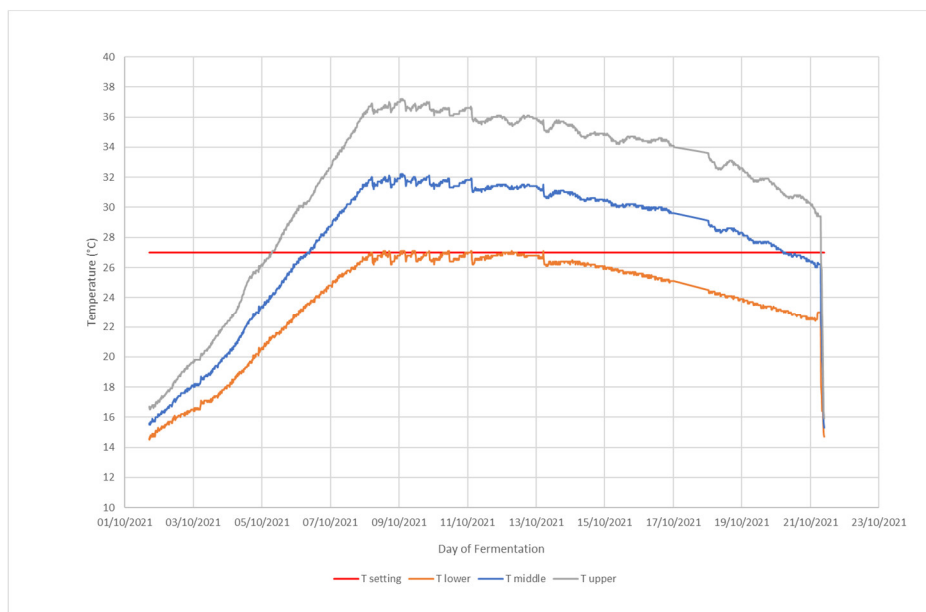

**Figure S1.** Temperature kinetics of the three sensors of the Control vessel during fermentation, sensors located in the lower, middle and upper part of the vessel.

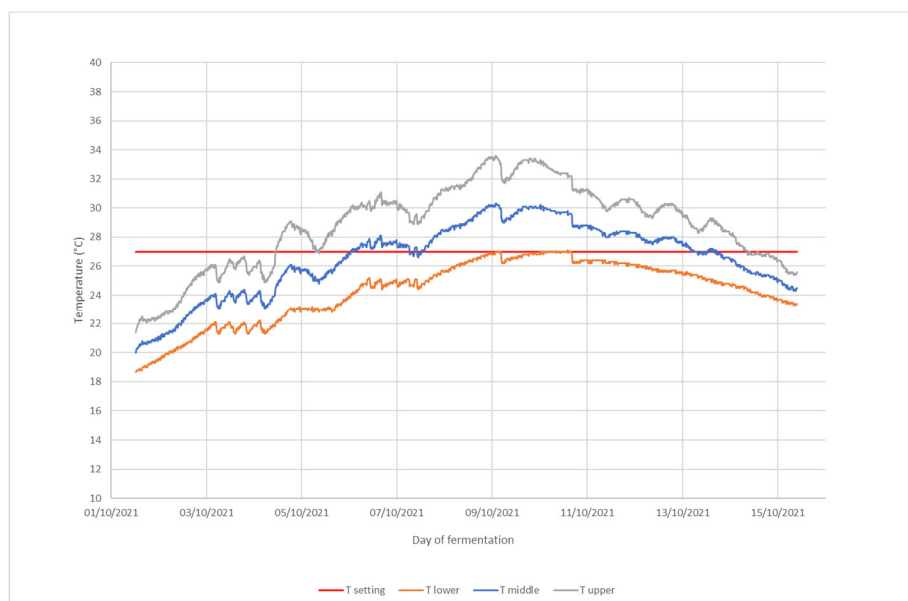

**Figure S2.** Temperature kinetics of three sensors of the ADCF vessel during fermentation, sensors located in the lower, middle and upper part of the vessel.

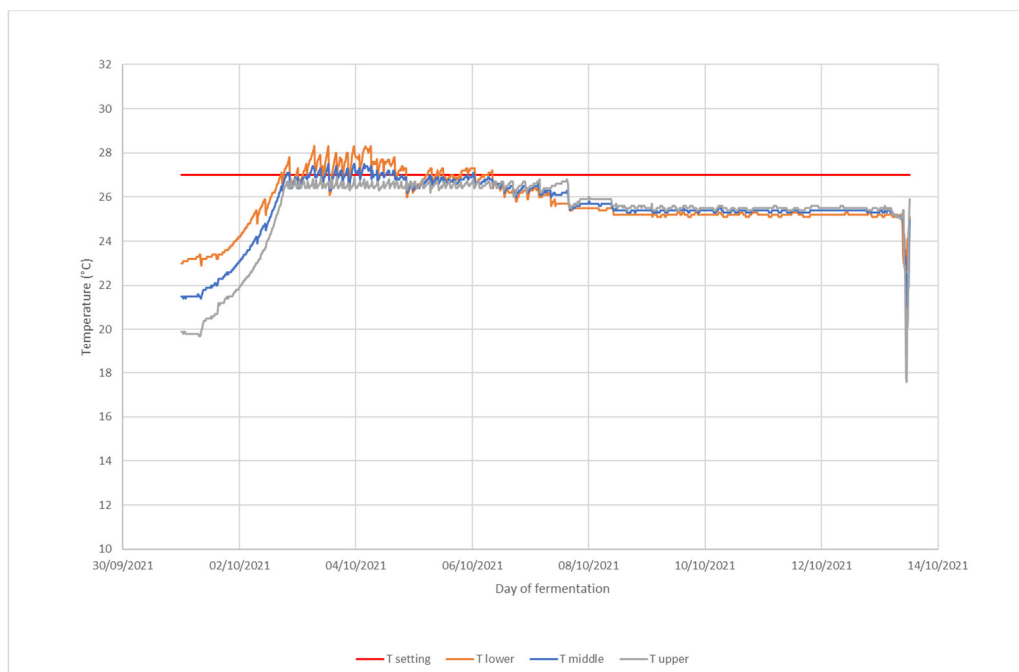

**Figure S3.** Temperature kinetics of the three sensors of the AIR MIX vessel during fermentation, sensors located in the lower, middle and upper part of the vessel.
